# Supplementary material
Source: PubMed Central journal article supplement (PMC4018915)

Supplementary Table 1 – Key properties of the manures applied in the spring and fall of 2012, and spring of 2013. Manure sourced from the same commercial farms was used in every instance.

Spring 2012

|               | <b>Dry<br/>Matter</b> | <b>Total N</b> | <b>NH<sub>4</sub>-N</b> | <b>Organic<br/>matter<br/>content</b> | <b>C:N</b> | <b>pH</b> |
|---------------|-----------------------|----------------|-------------------------|---------------------------------------|------------|-----------|
| <b>Manure</b> | %                     | %              | mg/L                    | %                                     |            |           |
| <b>Swine</b>  | 2.4                   | 0.28           | 1935                    | 1.9                                   | 4:1        | 7.6       |
| <b>Dairy</b>  | 2.3                   | 0.17           | 872                     | 1.8                                   | 6:1        | 6.9       |

Fall 2012

|               | <b>Dry<br/>Matter</b> | <b>Total N</b> | <b>NH<sub>4</sub>-N</b> | <b>Organic<br/>matter<br/>content</b> | <b>C:N</b> | <b>pH</b> |
|---------------|-----------------------|----------------|-------------------------|---------------------------------------|------------|-----------|
| <b>Manure</b> | %                     | %              | mg/L                    | %                                     |            |           |
| <b>Swine</b>  | 0.8                   | 0.2            | 1803                    | 0.6                                   | 2:1        |           |
| <b>Dairy</b>  | 7.4                   | 0.22           | 782                     | 5.8                                   | 15:1       | 6.7       |

Spring 2013

|               | <b>Dry<br/>Matter</b> | <b>Total N</b> | <b>NH<sub>4</sub>-N</b> | <b>Organic<br/>matter<br/>content</b> | <b>C:N</b> | <b>pH</b> |
|---------------|-----------------------|----------------|-------------------------|---------------------------------------|------------|-----------|
| <b>Manure</b> | %                     | %              | mg/L                    | %                                     |            |           |
| <b>Swine</b>  | 2.0                   | 0.42           | 3168                    | 1.2                                   | 2:1        | 7.2       |
| <b>Dairy</b>  | 1.6                   | 0.16           | 1037                    | 1.2                                   | 3:1        | 7.3       |

Supplementary Table 2. Timing of manure application, crop planting and crop harvest. Indicated in brackets is the Julian day the indicated operation was undertaken, or in the case of planting and harvesting the number of days elapsed since the indicated manure application.

| <b>APPLICATION</b><br><b>2012 SPRING</b>    | <b>VEGETABLE</b> | <b>PLANT DATE</b><br><b>2012</b>                                    | <b>HARVEST DATE</b><br><b>2012</b>                                    | <b>PLANT DATE</b><br><b>2013 (days</b><br><b>after application)</b> | <b>HARVEST</b><br><b>DATE 2013</b><br><b>(days after</b><br><b>application)</b> |
|---------------------------------------------|------------------|---------------------------------------------------------------------|-----------------------------------------------------------------------|---------------------------------------------------------------------|---------------------------------------------------------------------------------|
| Swine<br>Apr. 10 <sup>th</sup><br>(day 101) | Tomato (56d)     | May 22 <sup>nd</sup> (day143)                                       | Aug 8 <sup>th</sup> (day 221)                                         |                                                                     |                                                                                 |
|                                             | Lettuce (70d)    | May 7 <sup>th</sup> (day 128)                                       | July 18 <sup>th</sup> (day 200)                                       | May 16 <sup>th</sup> (401)                                          | July 29 <sup>th</sup> (475)                                                     |
|                                             | Radish (22d)     | July 17 <sup>th</sup> (day 199)                                     | Aug 16 <sup>th</sup> (day 229)                                        | May 16 <sup>th</sup> (401)                                          | Jun 25 <sup>th</sup> (441)                                                      |
|                                             | Carrot (75d)     | May 28 <sup>th</sup> (day 149)                                      | Sept 10 <sup>th</sup> (day 254)                                       | Jul 15 <sup>th</sup> (461)                                          | Oct 22 <sup>th</sup> (560)                                                      |
| Dairy<br>Apr. 10 <sup>th</sup><br>(day 101) | Tomato (56d)     | May 22 <sup>nd</sup> (day143)                                       | Aug 8 <sup>th</sup> (day 221)                                         |                                                                     |                                                                                 |
|                                             | Lettuce (70d)    | May 7 <sup>th</sup> (day 128)                                       | July 18 <sup>th</sup> (day 200)                                       | May 16 <sup>th</sup> (401)                                          | July 29 <sup>th</sup> (475)                                                     |
|                                             | Radish (22d)     | July 17 <sup>th</sup> (day 199)                                     | Aug 16 <sup>th</sup> (day 229)                                        | May 16 <sup>th</sup> (401)                                          | Jun 25 <sup>th</sup> (441)                                                      |
|                                             | Carrot (75d)     | May 28 <sup>th</sup> (day 149)                                      | Sept 10 <sup>th</sup> (day 254)                                       | Jul 15 <sup>th</sup> (461)                                          | Oct 22 <sup>th</sup> (560)                                                      |
| Control                                     | Tomato (56d)     | May 22 <sup>nd</sup> (day143)                                       | Aug 8 <sup>th</sup> (day 221)                                         |                                                                     |                                                                                 |
|                                             | Lettuce (70d)    | May 7 <sup>th</sup> (day 128)                                       | July 18 <sup>th</sup> (day 200)                                       | May 16 <sup>th</sup> (401)                                          | July 29 <sup>th</sup> (475)                                                     |
|                                             | Radish (22d)     | July 17 <sup>th</sup> (day 199)                                     | Aug 16 <sup>th</sup> (day 229)                                        | May 16 <sup>th</sup> (401)                                          | Jun 25 <sup>th</sup> (441)                                                      |
|                                             | Carrot (75d)     | May 28 <sup>th</sup> (day 149)                                      | Sept 10 <sup>th</sup> (day 254)                                       | Jul 15 <sup>th</sup> (461)                                          | Oct 22 <sup>th</sup> (560)                                                      |
| <b>APPLICATION</b><br><b>2012 FALL</b>      | <b>VEGETABLE</b> | <b>PLANT DATE</b><br><b>2013 (days</b><br><b>after application)</b> | <b>HARVEST DATE</b><br><b>2013 (days after</b><br><b>application)</b> |                                                                     |                                                                                 |

|                                              |                  |                                  |                                    |
|----------------------------------------------|------------------|----------------------------------|------------------------------------|
| Swine<br>Sept. 28 <sup>th</sup><br>(day 272) | Lettuce (70d)    | May 16 <sup>th</sup> (229)       | July 31 <sup>st</sup> (305)        |
|                                              | Radish (22d)     | May 16 <sup>th</sup> (229)       | Jun 26 <sup>th</sup> (270)         |
|                                              | Carrot (75d)     | Jul 15 <sup>th</sup> (289)       | Oct24 <sup>th</sup> (390)          |
| Dairy<br>Sept. 28 <sup>th</sup><br>(day 272) | Lettuce (70d)    | May 16 <sup>th</sup> (229)       | July 31 <sup>st</sup> (305)        |
|                                              | Radish (22d)     | May 16 <sup>th</sup> (229)       | Jun 26 <sup>th</sup> (270)         |
|                                              | Carrot (75d)     | Jul 15 <sup>th</sup> (289)       | Oct24 <sup>th</sup> (390)          |
| Control                                      | Lettuce (70d)    | May 16 <sup>th</sup> (229)       | July 31 <sup>st</sup> (305)        |
|                                              | Radish (22d)     | May 16 <sup>th</sup> (229)       | Jun 26 <sup>th</sup> (270)         |
|                                              | Carrot (75d)     | Jul 15 <sup>th</sup> (289)       | Oct24 <sup>th</sup> (390)          |
| <b>APPLICATION</b><br><b>2013 SPRING</b>     | <b>VEGETABLE</b> | <b>PLANT DATE</b><br><b>2013</b> | <b>HARVEST DATE</b><br><b>2013</b> |
| Swine<br>May 7 <sup>th</sup><br>(day 127)    | Lettuce (70d)    | May 27 <sup>th</sup> (day 147)   | Aug 1 <sup>st</sup> (day213)       |
|                                              | Radish (22d)     | Aug 12 <sup>th</sup> (day 224)   | Sep 23 <sup>rd</sup> (day 266)     |
|                                              | Carrot (75d)     | Jul 15 <sup>th</sup> (day 196)   | Oct 31 <sup>st</sup> (day304)      |
| Dairy<br>May 7 <sup>th</sup><br>(day 127)    | Lettuce (70d)    | May 27 <sup>th</sup> (day 147)   | Aug 1 <sup>st</sup> (day213)       |
|                                              | Radish (22d)     | Aug 12 <sup>th</sup> (day 224)   | Sep 23 <sup>rd</sup> (day 266)     |
|                                              | Carrot (75d)     | Jul 15 <sup>th</sup> (day 196)   | Oct 31 <sup>st</sup> (day304)      |
| Control                                      | Lettuce (70d)    | May 27 <sup>th</sup> (day 147)   | Aug 1 <sup>st</sup> (day213)       |
|                                              | Radish (22d)     | Aug 12 <sup>th</sup> (day 224)   | Sep 23 <sup>rd</sup> (day 266)     |
|                                              | Carrot (75d)     | Jul 15 <sup>th</sup> (day 196)   | Oct 31 <sup>st</sup> (day304)      |

Table S3. The abundance of gene targets quantified in manures at the time of application.

|              | Gene copy number per gram of manure (wet weight) |             |               |               |               |                  |             |
|--------------|--------------------------------------------------|-------------|---------------|---------------|---------------|------------------|-------------|
|              | <i>sulI</i>                                      | <i>intI</i> | <i>erm(B)</i> | <i>str(A)</i> | <i>str(B)</i> | IncW <i>repA</i> | <i>rrnS</i> |
| Spring 2012  |                                                  |             |               |               |               |                  |             |
| Swine manure | 3.9E+07                                          | 6.9E+08     | 2.1E+09       | 2.00E+08      | 3.7E+07       | 3.7E+07          | 8.5E+08     |
| Dairy manure | 1.1E+07                                          | 1.0E+07     | 3.4E+06       | 1.03E+07      | 5.5E+07       | 1.4E+06          | 1.2E+09     |
| Fall 2012    |                                                  |             |               |               |               |                  |             |
| Swine manure | 8.6E+08                                          | 6.8E+07     | 1.5E+10       | 1.5E+08       | 4.1E+08       | 1.5E+07          | 3.7E+10     |
| Dairy manure | 2.9E+08                                          | 2.8E+07     | 4.3E+08       | 3.8E+08       | 9.7E+08       | 1.5E+07          | 6.9E+10     |
| Spring 2013  |                                                  |             |               |               |               |                  |             |
| Swine manure | 4.1E+08                                          | 1.0E+07     | 4.2E+10       | 2.0E+07       | 5.9E+07       | 9.9E+05          | 6.6E+10     |
| Dairy manure | 5.4E+07                                          | 6.4E+06     | 1.0E+08       | 1.1E+07       | 3.1E+07       | 1.2E+06          | 3.5E+10     |

Table S4. Estimated loading rates for a representative manure application of 8500 US gal/acre. Key assumptions and a sample calculation are appended in a footnote.

|              | Gene copy number per gram of manured soil |             |               |               |               |                  |             |
|--------------|-------------------------------------------|-------------|---------------|---------------|---------------|------------------|-------------|
|              | <i>sulI</i>                               | <i>intI</i> | <i>erm(B)</i> | <i>str(A)</i> | <i>str(B)</i> | IncW <i>repA</i> | <i>rrnS</i> |
| Spring 2012  |                                           |             |               |               |               |                  |             |
| Swine manure | 1.23E+06                                  | 2.18E+07    | 6.63E+07      | 6.31E+06      | 1.17E+06      | 1.17E+06         | 2.68E+07    |
| Dairy manure | 3.47E+05                                  | 3.16E+05    | 1.07E+05      | 3.25E+05      | 1.74E+06      | 4.42E+04         | 3.79E+07    |
| Fall 2012    |                                           |             |               |               |               |                  |             |
| Swine manure | 2.71E+07                                  | 2.15E+06    | 4.73E+08      | 4.73E+06      | 1.29E+07      | 4.73E+05         | 1.17E+09    |
| Dairy manure | 9.15E+06                                  | 8.84E+05    | 1.36E+07      | 1.20E+07      | 3.06E+07      | 4.73E+05         | 2.18E+09    |
| Spring 2013  |                                           |             |               |               |               |                  |             |
| Swine manure | 1.29E+07                                  | 3.16E+05    | 1.33E+09      | 6.31E+05      | 1.86E+06      | 3.12E+04         | 2.08E+09    |
| Dairy manure | 1.70E+06                                  | 2.02E+05    | 3.16E+06      | 3.47E+05      | 9.78E+05      | 3.79E+04         | 1.10E+09    |

Table S4 sample calculation: Estimated soil loading rate for *sull* in swine manure, spring 2012 application.

Assumptions:

Density of manure slurry is 1 kg/L

Bulk density of soil is 1.5 kg/L

Application rate is 8500 US gal/acre, equivalent to 71000 L/ha, and is uniformly incorporated to a depth of 15 cm

An area of 1 ha to a depth of 15 cm represents a volume of  $1.5 \times 10^6$  L of soil, or a mass of  $2.25 \times 10^9$  g of soil

The additional moisture conferred by the manure or antecedent moisture in the soil does not change bulk density

Calculation:

$[3.9 \times 10^{10} \text{ copies per kg manure} \times 71000 \text{ kg manure/ha}] / 2.25 \times 10^9 \text{ kg soil} = 1.23 \times 10^6 \text{ copies per g soil.}$

Figure S1. Air temperature and precipitation during the period of observation in 2012 (top panel) and 2013 (bottom panel). Data are presented as a 10-day running average measured over the indicated Julian days.

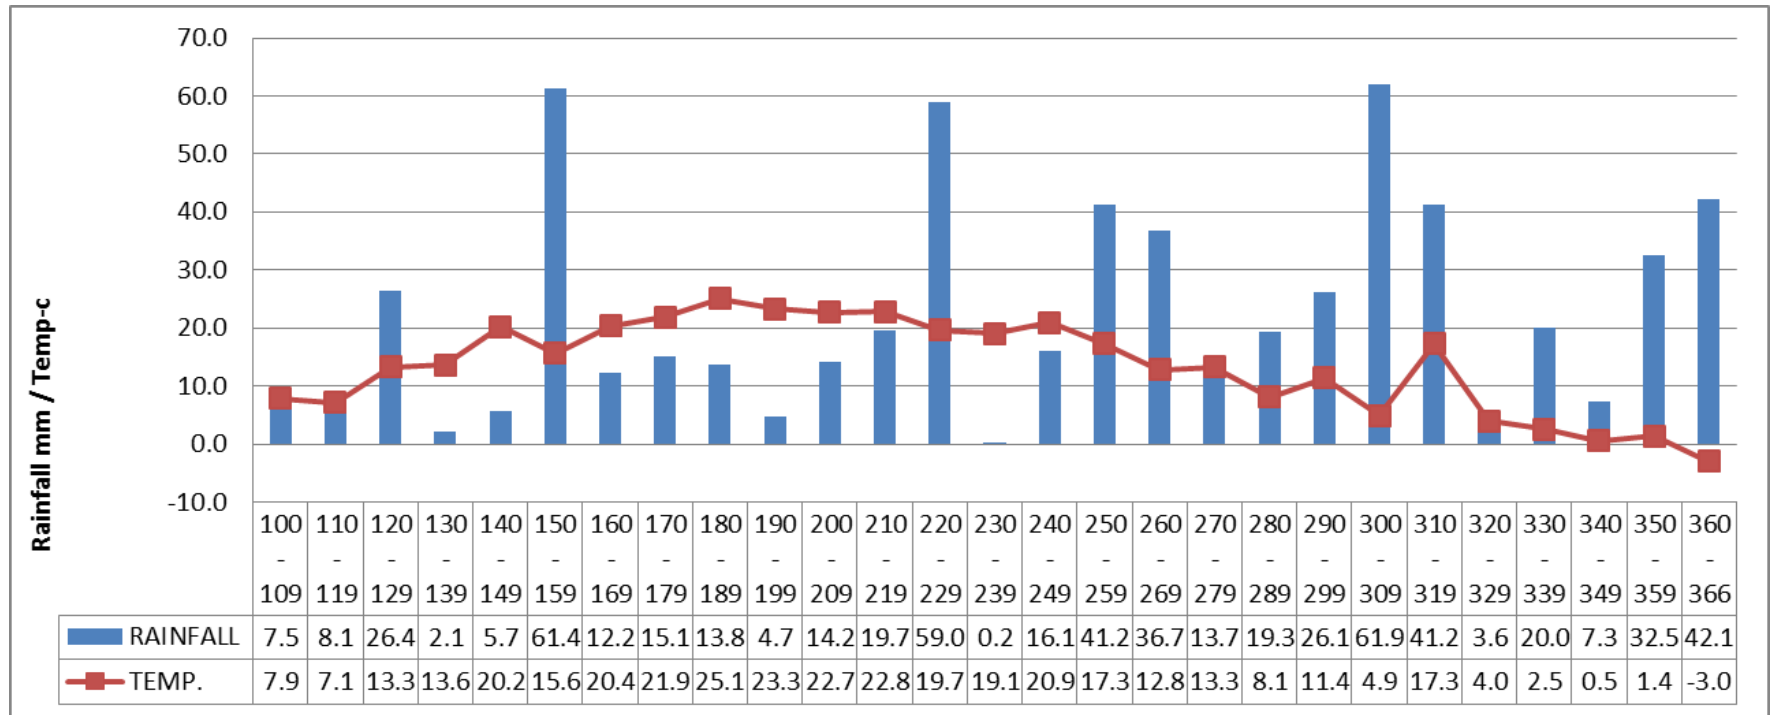

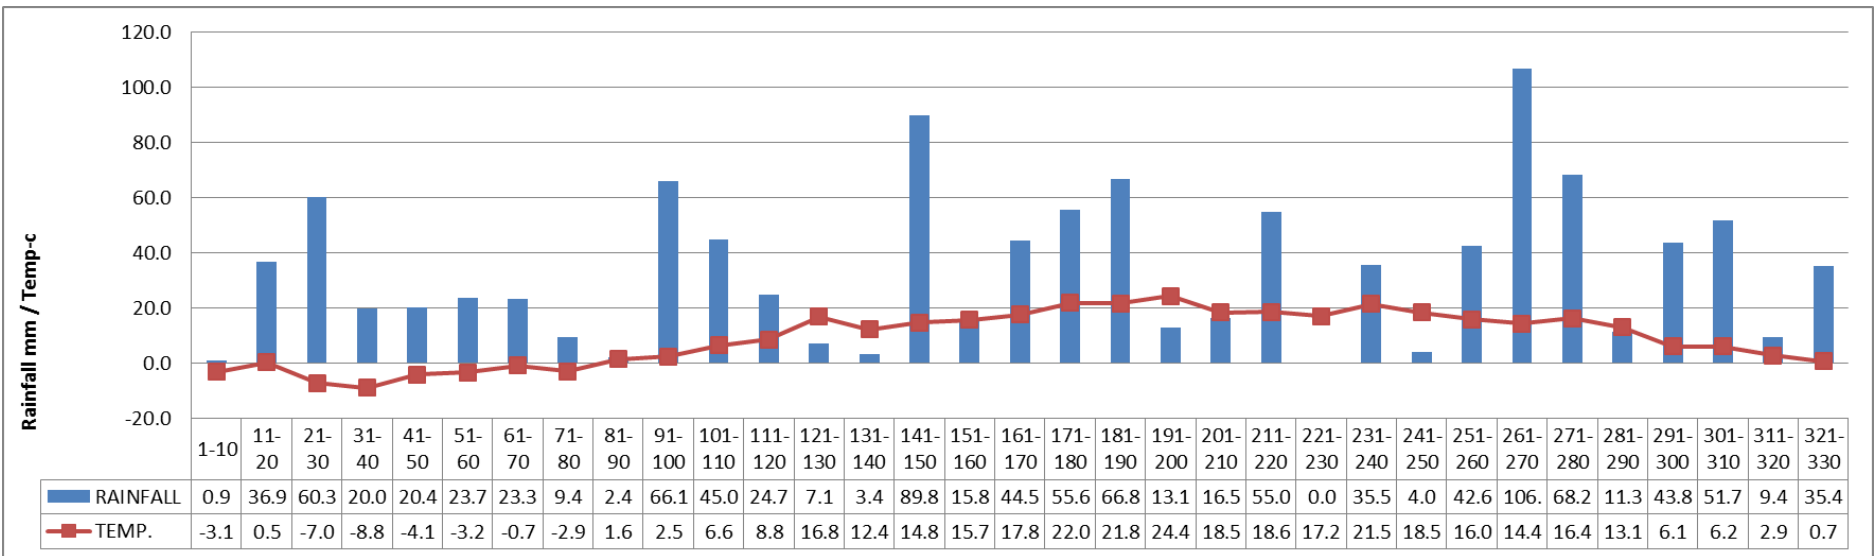



Supplemental Figure S2: Copy number of the *rrnS* gene target (on a soil wet weight basis) used to infer the size of 'total' bacterial soil populations. Sampling dates are given as Julian day. Data is presented as mean  $\pm$  standard deviation.

***rrnS* gene quantification for S2012 application**

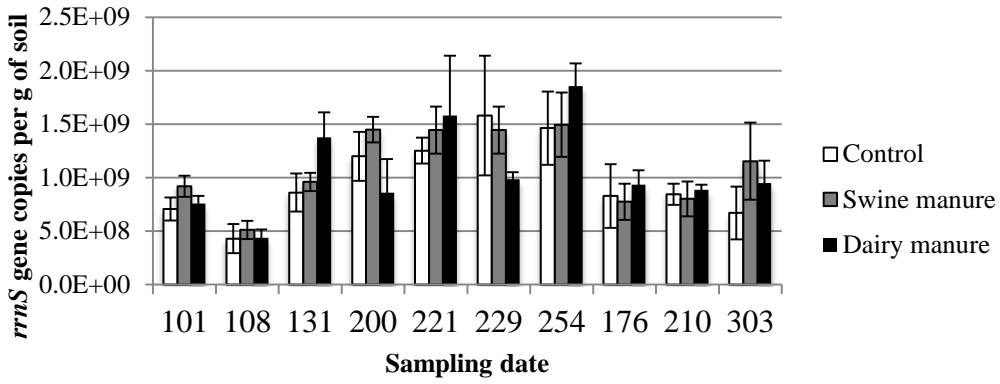

***rrnS* gene quantification for F2012 application**

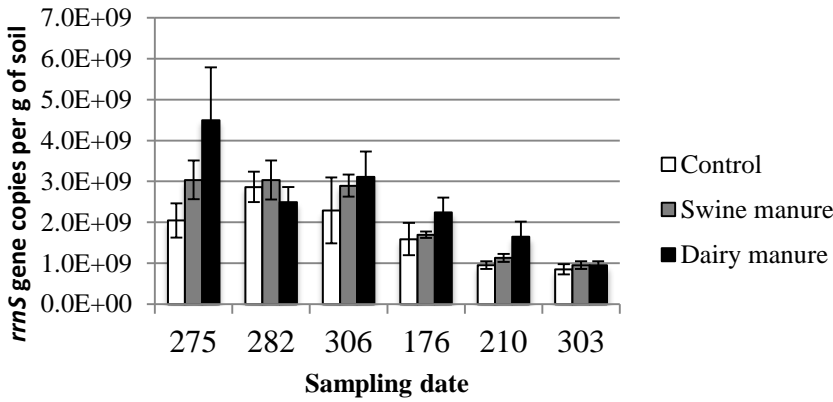

***rrnS* gene quantification for S2013 application**

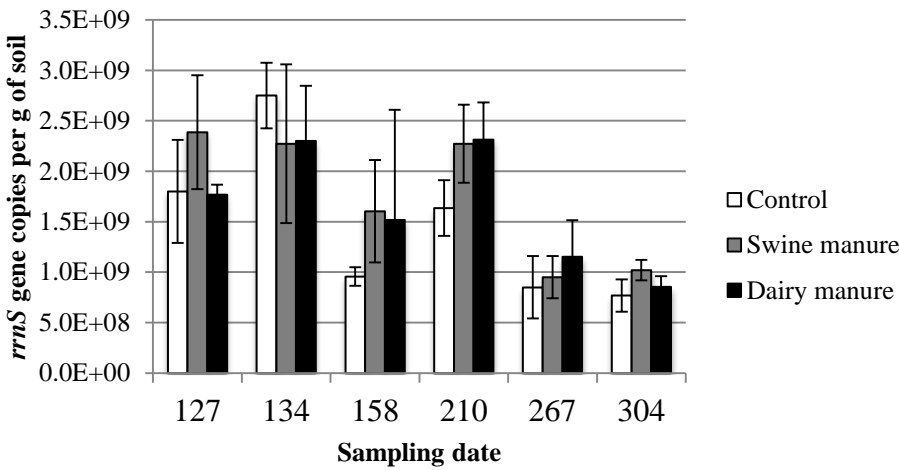

Supplement: AEM.00231-14_zam999105360so1.pdf [file AEM.00231-14_zam999105360so1.pdf]
